# Supplementary material
Source: PubMed Central journal article supplement (PMC3136266)
Supplement: 1100901108_pnas.201100901SI.pdf [file 1100901108_pnas.201100901SI.pdf]

# Supporting Information

Ding et al. 10.1073/pnas.1100901108

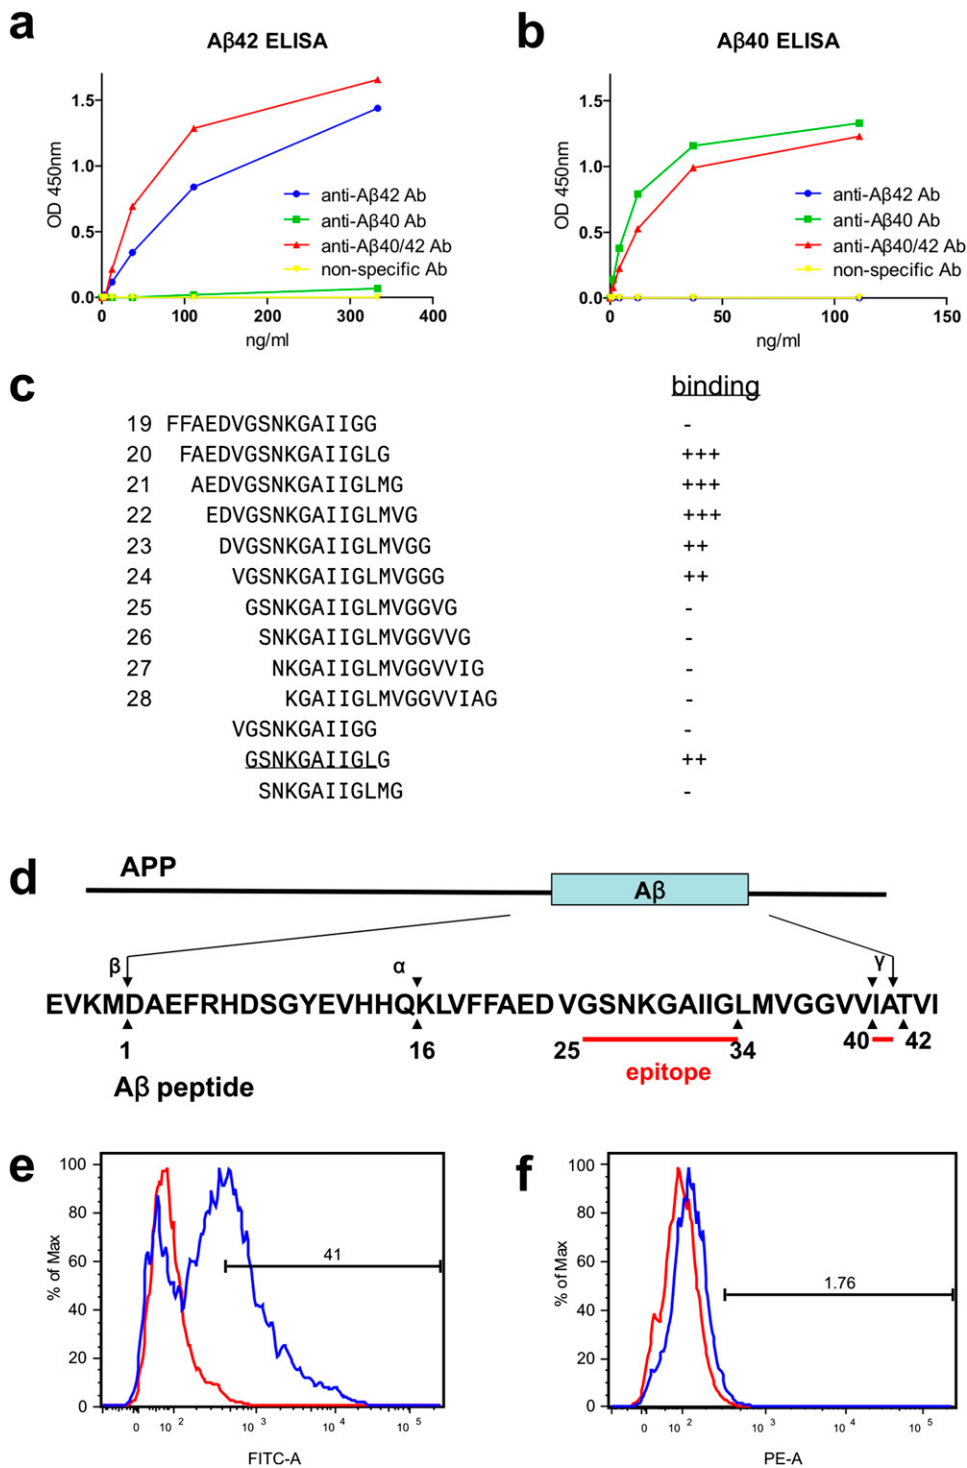

**Fig. S1.** Characterization of anti-amyloid  $\beta$  (A $\beta$ ) 40/42 antibody targeting to the C-terminal region of A $\beta$  peptide. (*A* and *B*) Antibody binding to either A $\beta$  peptide 40 (A $\beta$ 40) or 42 (A $\beta$ 42) was shown by peptide-specific ELISA with serial dilution of a panel of antibodies: A $\beta$ 42-specific antibody in blue, A $\beta$ 40-specific antibody in green, A $\beta$ 40/42 bispecific antibody in red, and a nonspecific antibody control in yellow. (*C* and *D*) Localization of the minimal epitope for binding of the A $\beta$ 40/42 antibody was determined by ELISA using a panel of partially overlapping peptides. +++, strongest signal on ELISA (OD > 2); ++, moderate signal (OD = 1–2); +, modest signal (OD < 1); –, minimal or no signal. The underlined peptide in *C* indicated the minimal required sequence for antibody binding. The relative location of the epitope (underlined in red) within the full-length human amyloid precursor protein (APP) is illustrated in *D*. (*E* and *F*) Cell surface binding of N-terminal antibody, 6E10 (*E*, blue curve), to human APP (hAPP)-transfected 293 cells was significantly above that of a secondary only control (*E*, red curve). There was no appreciable binding of A $\beta$ 40/42 antibody (*F*, blue curve) to hAPP-expressing cells compared with a secondary only control (*F*, red curve).

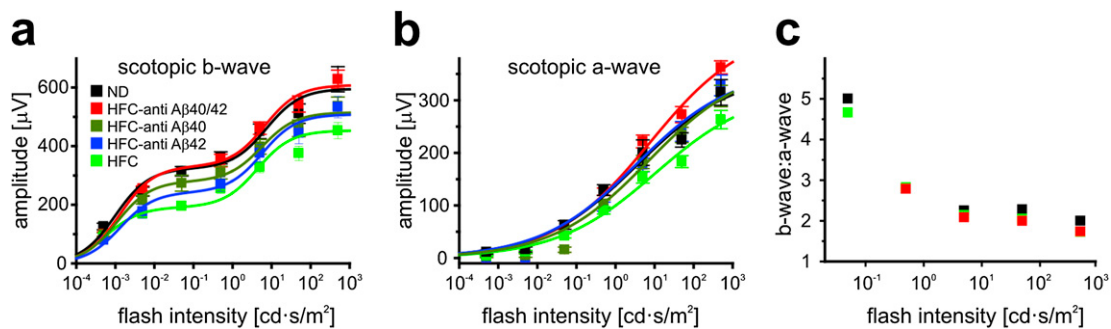

**Fig. S2.** Visual function is protected in anti-Aβ40/42-treated apolipoprotein E (*APOE4*) high-fat, cholesterol-enriched diet (HFC) mice. (A and B) Scotopic electroretinogram (ERG) flash responses. (A) Stimulus response curves of b-wave amplitudes. Baseline ERGs obtained from normal *APOE4*-normal diet (ND) controls (black, ND) and affected *APOE4*-HFC vehicle-treated controls (green, HFC). b-Wave amplitudes were fully preserved in *APOE4*-HFC mice that received weekly 3 mg/kg i.p. anti-Aβ40/42 antibody injections (red, HFC-anti Aβ40/42), with no significant difference from *APOE4*-ND controls. b-Waves in mice treated with anti-Aβ40 antibody (olive green, HFC-anti Aβ40) during HFC diet exposure are partially protected, which was found previously in a pilot study (1), whereas in the anti-Aβ42-treated mice (blue, HFC-anti Aβ42), there did not seem to be protection from visual function loss compared with normal *APOE4*-ND controls (black) and affected *APOE4*-HFC vehicle-treated controls (green). (B) a-Wave amplitudes from control and treated animals as in A were determined from the a-wave peaks of ERG responses and plotted as a function of flash intensity. Similar to the trend observed for b-wave amplitudes, mice on HFC diet displayed a reduction in a-wave amplitudes (green) compared with the ND group (black), an effect that was not obvious in the antibody-treated groups. Data are expressed as mean ± SEM. (C) The ratios of a- and b-wave amplitudes as a function of flash intensity are plotted for normal control (black), anti-Aβ40/42 antibody-treated (red), and HFC control (green) *APOE4* animals. No significant differences in the ratios were detected between the three groups, indicating that the attenuation in b-wave amplitudes originated in the photoreceptors.

1. Ding JD, et al. (2008) Targeting age-related macular degeneration with Alzheimer's disease based immunotherapies: Anti-amyloid-beta antibody attenuates pathologies in an age-related macular degeneration mouse model. *Vision Res* 48:339–345.

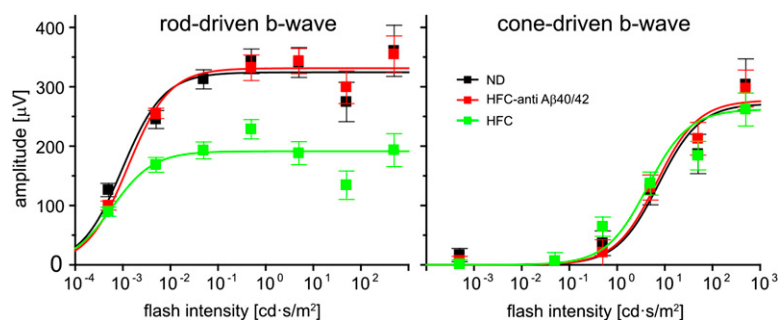

**Fig. S3.** The rod ERG response is attenuated in the *APOE4*-HFC mouse. The rod- and cone-driven components of the b-wave stimulus-response curves shown in Fig. S2A are from *APOE4* mice aged ≥65 wk that were fed a normal diet (black, ND) or a high-fat, cholesterol-enriched diet (green, HFC) and age-matched *APOE4*-HFC mice injected with 3 mg/kg anti-Aβ40/42 (red, HFC-anti-Aβ40/42). Data are expressed as mean ± SEM.

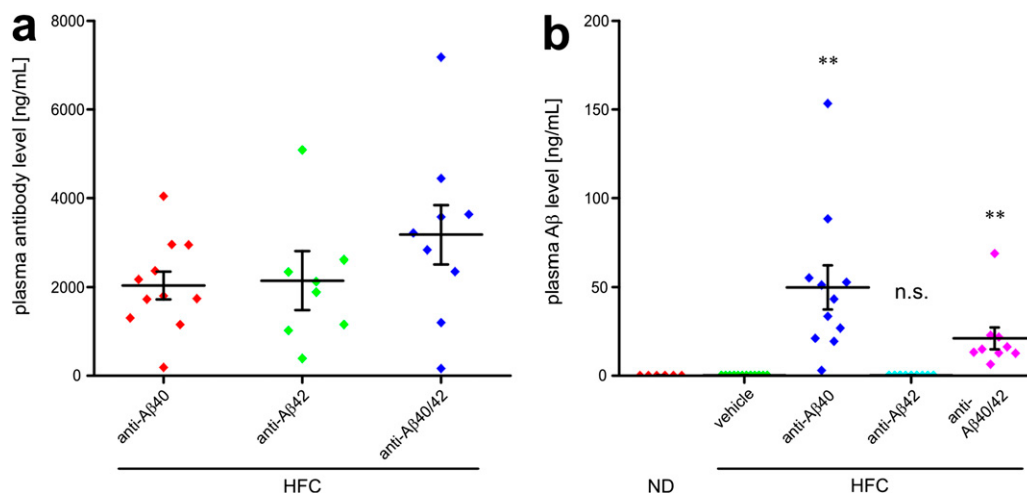

**Fig. S4.** Plasma levels of A $\beta$  and anti-A $\beta$  antibodies. (A) Plasma levels of three anti-A $\beta$  antibodies (nanograms per milliliter) 3 d after the last injection were quite similar to one another (one-way ANOVA;  $P = 0.23$ ). (B) Plasma levels of total (bound/unbound) A $\beta$  in all groups were analyzed by unpaired Student  $t$  test with Welch's correction. Consistent with the peripheral sink hypothesis, plasma from animals treated with anti-A $\beta$ 40 (\*\* $P = 0.0026$ ) or anti-A $\beta$ 40/42 (\*\* $P < 0.0096$ ) antibodies showed increased plasma levels of A $\beta$ 40. In contrast, in the anti-A $\beta$ 42-treated group, there was no statistically significant elevation in plasma A $\beta$ 42 levels (n.s., not significant at  $P = 0.32$ ).

**Table S1.** Human donor eyes used for retinal pigmented epithelium flat-mount analyses

| Donor number | Age (y) | Sex | Death to procurement (h:min) | Cause of death               | Ocular diagnosis | Ocular phenotype       |
|--------------|---------|-----|------------------------------|------------------------------|------------------|------------------------|
| 03-01        | 49      | M   | 4:56                         | Myocardial infarction        | Normal           | Few small drusen       |
| 01-03        | 77      | M   | 3:30                         | COPD and respiratory failure | Normal           | Few small drusen       |
| 03-03        | 78      | F   | 4:40                         | Myocardial infarction        | AMD              | Moderate drusen load   |
| 02-05        | 86      | F   | 8:53                         | COPD and respiratory failure | AMD              | Abundant small drusen  |
| 2004-06      | 77      | M   | 8:20                         | No data                      | AMD              | Very heavy drusen load |
| 0967-07      | 75      | F   | 4:39                         | MI and pneumonia             | AMD              | Moderate drusen load   |
| 2707-09      | 85      | F   | 3:35                         | Acute coronary syndrome      | Normal           | Few small drusen       |
| 3024-09      | 72      | F   | 5:17                         | Renal failure                | Normal           | Few small drusen       |
| 1276-08      | 76      | M   | 6:00                         | CVA                          | Normal           | Few small drusen       |

M, male; F, female; COPD, chronic obstructive pulmonary disease; AMD, age-related macular degeneration; MI, myocardial infarction; CVA, cerebrovascular accident.

**Table S2.** Distribution of mice within groups used for testing different anti-A $\beta$  antibodies

| Animals (number and genotype) | Diet | Injection*                  | Group designation                        |
|-------------------------------|------|-----------------------------|------------------------------------------|
| 9, <i>APOE4</i>               | ND   | Vehicle injection           | <i>APOE4</i> -ND                         |
| 9, <i>APOE4</i>               | HFC  | Vehicle injection           | <i>APOE4</i> -HFC                        |
| 9, <i>APOE4</i>               | HFC  | Anti-A $\beta$ 42 (7G10-D)  | <i>APOE4</i> -HFC + anti-A $\beta$ 42    |
| 12, <i>APOE4</i>              | HFC  | Anti-A $\beta$ 40 (2H6-D)   | <i>APOE4</i> -HFC + anti-A $\beta$ 40    |
| 12, <i>APOE4</i>              | HFC  | Anti-A $\beta$ 40/42 (RN6G) | <i>APOE4</i> -HFC + anti-A $\beta$ 40/42 |

\*One time per week i.p. injections coinciding with the switch to HFC diet for 8–9 wk.

**Table S3.** Distribution of mice within groups used for testing anti-A $\beta$ 40/42 antibody dose response

| Animals (number and genotype) | Diet | Injection*                  | Dose (mg/kg) | Group designation |
|-------------------------------|------|-----------------------------|--------------|-------------------|
| 11, <i>APOE4</i>              | ND   | Vehicle injection           | 0            | <i>APOE4</i> -ND  |
| 10, <i>APOE4</i>              | HFC  | Vehicle injection           | 0            | <i>APOE4</i> -HFC |
| 11, <i>APOE4</i>              | HFC  | Anti-A $\beta$ 40/42 (RN6G) | 3            | HFC + 3 mg/kg     |
| 11, <i>APOE4</i>              | HFC  | Anti-A $\beta$ 40/42 (RN6G) | 0.3          | HFC + 0.3 mg/kg   |
| 10, <i>APOE4</i>              | HFC  | Anti-A $\beta$ 40/42 (RN6G) | 0.03         | HFC + 0.03 mg/kg  |

\*One time per week i.p. injections coinciding with the switch to HFC diet for 8–9 wk.
